# Supplementary material for: Identification of two GH18 chitinase family genes and their use as targets for detection of the crayfish-plague oomycete Aphanomyces astaci
Source: PubMed Central journal article supplement (PMC2751781; doi:10.1186/1471-2180-9-184), 2009-08-31
Supplement: 1471-2180-9-184-S2.pdf [file 1471-2180-9-184-S2.pdf]

**CHI2** **TAA**ATGCACATTGAATTCTTTTATATTAGTAACTCATATAACCTCGAATTGACCATTGGGT-TGTG-TGTAAAAAAAAAAAAAAAAA  
**CHI3** **TAA**AAGCGCATTTCG-TT-GTGTATGTTAGT----CGAATAACCTTGAATTGAAGATTCGATGTGAGTTGTGAAAAAAAAAAAAAAAAA

**Additional file 2. Sequences of 3' untranslated regions (UTRs) of *CHI2* and *CHI3* mRNAs.** Bold letters: stop codon, grey background: sequence identity, dash: deletion, underline: putative polyadenylation signal. Sequences were derived from GenBank:FJ439177 and FJ386997, respectively.
