# Supplementary material for: Identification of two GH18 chitinase family genes and their use as targets for detection of the crayfish-plague oomycete Aphanomyces astaci
Source: PubMed Central journal article supplement (PMC2751781; doi:10.1186/1471-2180-9-184), 2009-08-31
Supplement: 1471-2180-9-184-S3.pdf [file 1471-2180-9-184-S3.pdf]

**Additional file 3. Amino-acid substitutions in the GH18 catalytic site of oomycete species**

| Species                       | Protein | GenBank accession number | Conserved consensus sequence<br>(N-terminal → C-terminal) |      |   |          |      |          |      |   |   |
|-------------------------------|---------|--------------------------|-----------------------------------------------------------|------|---|----------|------|----------|------|---|---|
|                               |         |                          | (LIVMFY)                                                  | (DN) | G | (LIVMFY) | (DN) | (LIVMFY) | (DN) | X | E |
| <i>Aphanomyces astaci</i>     | Chi2    | ABK59977                 |                                                           |      | F |          |      |          |      |   |   |
| <i>A. astaci</i>              | Chi3    | ACJ66260                 |                                                           |      | F |          |      |          |      |   |   |
| <i>A. helicoides</i>          | Chi1    | AAX59706                 |                                                           |      | F |          |      |          |      |   |   |
| <i>A. laevis</i>              | Chi1    | AAX59705                 |                                                           |      | F |          |      |          |      |   |   |
| <i>A. repetans</i>            | Chi1    | ACB12070                 |                                                           |      | F |          |      |          |      |   |   |
| <i>Achlya racemosa</i>        | Chi1    | AAX59707                 |                                                           |      | F |          |      |          |      |   |   |
| <i>Leptolegnia caudata</i>    | Chi1    | AAX59708                 |                                                           |      | F |          |      |          |      |   |   |
| <i>Saprolegnia parasitica</i> | Chi1    | AAX59704                 |                                                           |      | F |          |      |          |      |   |   |
| <i>Trichosporon cutaneum</i>  | Chi1    | AAX59703                 |                                                           |      | F |          |      |          |      |   |   |

blue: oomycetes; grey: fungus
