# Supplementary material for: Identification of two GH18 chitinase family genes and their use as targets for detection of the crayfish-plague oomycete Aphanomyces astaci
Source: PubMed Central journal article supplement (PMC2751781; doi:10.1186/1471-2180-9-184), 2009-08-31
Supplement: 1471-2180-9-184-S4.pdf [file 1471-2180-9-184-S4.pdf]

**Additional file 4. Phosphorylation and O-linked glycosylation predicted for Chi2 and Chi3.** O-glycosylation at residues that would otherwise be phosphorylated is one illustration of the complex interplay among eukaryotic post-translational modification systems (Caragea C, Sinapov J, Silvescu A, Dobbs D, Honavar V: Glycosylation site prediction using ensembles of Support Vector Machine classifiers. *BMC Bioinformatics* 2007, **8**:438.)

Thresholds of > 0.5 and  $\geq 0.4$  for potential phosphorylated and O-linked glycosylated sites, respectively. Sites for which both types of modification were predicted are highlighted in yellow. Bold letters: modified residue.

| position in Chi2 | site                       | score           |                 |
|------------------|----------------------------|-----------------|-----------------|
|                  |                            | phosphorylation | O-glycosylation |
| 15               | VVAMTSSVE                  | 0.67            | no              |
| 16               | VAMT <b>S</b> SVEA         | 0.54            | no              |
| 17               | AMT <b>S</b> SVEAA         | 0.60            | no              |
| 71               | VHDGYAAVQ                  | 0.85            | no              |
| 93               | GNNLYGNFG                  | 0.85            | no              |
| 84               | GRGDSW <b>N</b> DQ         | 1.00            | no              |
| 109              | KARGTKFGL                  | 0.94            | no              |
| 114              | KFGL <b>S</b> IGGW         | 0.79            | no              |
| 121              | GWTL <b>S</b> DKFS         | 0.51            | no              |
| 125              | SDKF <b>S</b> SIAS         | 0.55            | no              |
| 126              | DKF <b>S</b> SIAS <b>T</b> | 0.83            | no              |
| 129              | SSI <b>A</b> STETG         | 0.98            | no              |
| 132              | ASTETGRRT                  | 0.94            | no              |
| 140              | TFAK <b>S</b> SVKL         | 0.73            | no              |
| 141              | FAK <b>S</b> SVKLM         | 0.85            | no              |
| 204              | LSV <b>A</b> SPAGP         | 0.92            | no              |
| 236              | DLAG <b>S</b> WSK          | 0.57            | no              |
| 240              | SWSKYTDHQ                  | 0.97            | no              |
| 248              | QANLYEDPN                  | 0.94            | no              |
| 294              | SNGLYSNFT                  | 0.96            | no              |
| 329              | ATEIYDEKL                  | 0.76            | no              |
| 342              | SYDPTSKIF                  | 0.62            | no              |
| 343              | YDPT <b>S</b> KIFT         | 0.98            | no              |
| 347              | SKIFT <b>S</b> YEG         | 0.76            | no              |
| 348              | KIFT <b>S</b> YEGP         | 0.98            | no              |
| 361              | QKLDYIKQY                  | 0.72            | no              |
| 381              | ADAK <b>S</b> GSPR         | 0.76            | no              |
| 383              | AK <b>S</b> GSPRSL         | 0.99            | no              |
| 386              | GSPR <b>S</b> LITQ         | 0.77            | no              |
| 414              | PTSQYANIR                  | 0.91            | no              |
| 424              | GAAVTSAVP                  | no              | 0.50            |
| 425              | AAVT <b>S</b> AVPV         | no              | 0.73            |
| 430              | AVPVTSSPV                  | no              | 0.88            |
| 431              | VPVT <b>S</b> SPVA         | no              | 0.72            |
| 438              | VAPVTTVAP                  | no              | 0.48            |
| <b>439</b>       | <b>APVTTVAPV</b>           | <b>0.69</b>     | <b>0.75</b>     |
| 444              | VAPVTSEVP                  | no              | 0.69            |
| 445              | APVTSEVPV                  | no              | 0.97            |
| 450              | EVPVTSSPA                  | no              | 0.81            |
| 451              | VPVT <b>S</b> SPAA         | no              | 0.68            |
| 458              | AAPVTTVAP                  | no              | 0.65            |

|     |           |      |      |
|-----|-----------|------|------|
| 459 | APVTTVAPV | 0.69 | 0.81 |
| 464 | VAPVTSEVP | no   | 0.85 |
| 465 | APVTSEVPV | no   | 0.97 |
| 470 | EVPVTSSPD | no   | 0.65 |
| 471 | VPVTSSPDA | 0.99 | 0.50 |
| 472 | PVTSSPDAP | 0.58 | no   |
| 478 | DAPVTTVAP | no   | 0.50 |
| 479 | APVTTVAPV | 0.69 | 0.75 |
| 484 | VAPVTTVAP | no   | 0.77 |
| 485 | APVTSEVPV | no   | 0.97 |
| 490 | EVPVTSSPD | no   | 0.65 |
| 491 | VPVTSSPDA | 0.99 | 0.50 |
| 492 | PVTSSPDAP | 0.58 | no   |
| 498 | DAPVTTVAP | no   | 0.56 |
| 499 | APVTTVAPV | 0.69 | 0.80 |
| 504 | VAPVTSAVH | no   | 0.79 |
| 505 | APVTSAVHV | no   | 0.83 |
| 510 | AVHVTCSSY | no   | 0.68 |
| 514 | TCSSYAPVT | 0.66 | no   |
| 518 | YAPVTSSAV | no   | 0.45 |
| 519 | APVTSSAVP | no   | 0.53 |
| 525 | AVPETTPVE | no   | 0.67 |
| 526 | VPETTPVEP | 0.99 | 0.52 |
| 536 | TTEATPAPT | 0.92 | 0.76 |
| 532 | VEPVTTEAT | no   | 0.84 |
| 533 | EPVTTEATP | no   | 0.75 |
| 540 | TPAPTGGPI | no   | 0.85 |
| 550 | NPLETLAPT | 0.55 | 0.67 |
| 554 | TLAPTTTAA | no   | 0.40 |
| 556 | APTTTAAAG | no   | 0.48 |

| position in Chi3 | site                    | score           |                 |
|------------------|-------------------------|-----------------|-----------------|
|                  |                         | phosphorylation | O-glycosylation |
| 15               | VVAMTSSVE               | 0.67            | no              |
| 16               | VAMTSSVEA               | 0.54            | no              |
| 17               | AMTSSVEAA               | 0.60            | no              |
| 84               | EHGDSW <sup>S</sup> NDQ | 1.00            | no              |
| 93               | GNSLYGNFG               | 0.86            | no              |
| 109              | KARGTKFGL               | 0.94            | no              |
| 114              | KFGLSIGGW               | 0.79            | no              |
| 129              | SSIASTETG               | 0.98            | no              |
| 132              | ASTETGRRT               | 0.94            | no              |
| 140              | TFAKSSVKL               | 0.73            | no              |
| 141              | FAKSSVKLM               | 0.85            | no              |
| 204              | LSVASPAGP               | 0.92            | no              |
| 236              | DLAGSWSK                | 0.57            | no              |
| 240              | SWSKYTDHQ               | 0.97            | no              |
| 248              | QANLYEDPN               | 0.94            | no              |
| 259              | PGAKEYSSHN              | 0.76            | no              |
| 268              | AVQDYIKGG               | 0.52            | no              |
| 296              | SNGLYSNFT               | 0.96            | no              |
| 332              | ATEIYDEKL               | 0.76            | no              |
| 345              | SYDPTSKIF               | 0.62            | no              |
| 346              | YDPTSKIFT               | 0.98            | no              |
| 350              | SKIFTSYEG               | 0.76            | no              |
| 351              | KIFTSYEGP               | 0.98            | no              |
| 364              | QKLDYIKQY               | 0.72            | no              |
| 384              | ADAKSGSPR               | 0.76            | no              |
| 386              | AKSGSPRSL               | 0.99            | no              |
| 389              | GSPRSLITQ               | 0.77            | no              |
| 417              | PTSQYANIR               | 0.91            | no              |
| 426              | AGAVTTVAP               | no              | 0.57            |
| 427              | GAVTTVAPV               | 0.78            | 0.51            |
| 432              | VAPVTSAAP               | no              | 0.92            |
| 433              | APVTSAAPV               | no              | 0.80            |
| 438              | AAPVTSAAP               | no              | 0.93            |
| 439              | APVTSAAPV               | no              | 0.99            |
| 444              | AAPVTSSTA               | no              | 0.95            |
| 445              | APVTSSTAP               | no              | 0.93            |
| 446              | PVTSSTAPG               | no              | 0.58            |
| 447              | VTSSTAPGT               | no              | 0.73            |
| 451              | TAPGTPPAT               | no              | 0.90            |
| 452              | APGTPPATP               | 0.51            | 0.89            |
| 455              | TTPATPVTT               | 0.68            | 0.88            |
| 458              | ATPVTTTRAT              | 0.80            | 0.97            |
| 459              | TPVTTTRATP              | no              | 0.85            |
| 462              | TTRATPAPT               | 0.97            | 0.84            |
| 466              | TPAPTGGPI               | no              | 0.90            |
| 471              | GGPITNPPV               | no              | 0.52            |
| 476              | NPPVTSAPT               | 0.70            | 0.96            |
| 477              | PPVTSAPTT               | no              | 0.41            |
| 480              | TSAPTTTAA               | no              | 0.64            |
| 481              | SAPTTTAAA               | 0.52            | no              |
| 482              | APTTTAAAG               | no              | 0.58            |
| 508              | TLPYSQADC               | 0.77            | no              |
