# Supplementary material for: Identification of two GH18 chitinase family genes and their use as targets for detection of the crayfish-plague oomycete Aphanomyces astaci
Source: PubMed Central journal article supplement (PMC2751781; doi:10.1186/1471-2180-9-184), 2009-08-31
Supplement: 1471-2180-9-184-S5.pdf [file 1471-2180-9-184-S5.pdf]

|                                      | →                                 | ←                                     |
|--------------------------------------|-----------------------------------|---------------------------------------|
| <b>A. astaci</b> (AY310501)          | <b>ATACAAC</b> TTTCAACAGTGGATGTCT | CGTAA <b>TGCGAAT</b> TGCAGAA <b>T</b> |
| A. astaci GB04* (EU477365)           | .....                             | .....                                 |
| A. astaci GKS07*                     | .....                             | .....                                 |
| A. astaci Z12*                       | .....                             | .....                                 |
| A. astaci Hoe (AY683893)             | .....                             | .....                                 |
| A. astaci Kv1 (AY683894)             | .....                             | .....                                 |
| A. astaci Pc (AY683896)              | .....                             | .....                                 |
| <b>A. frigidophilus</b> (AY647192)   | .....                             | .....                                 |
| A. frigidophilus SAP472 (FM992370)   | .....                             | .....                                 |
| <b>A. invadans</b> (FM999229)        | .....                             | .....                                 |
| A. invadans WIC (AF396684)           | .....                             | .....                                 |
| A. piscicida NJM0003 (AY283641)      | .....                             | .....                                 |
| A. sp LIT7 (FM955258)                | .....                             | .....                                 |
| <b>A. repetans</b> (AY683897)        | .....                             | .....                                 |
| A. repetans LK29 (EU477367)          | .....                             | .....                                 |
| <b>A. laevis</b> (FM999237)          | .....                             | .....                                 |
| <b>A. stellatus</b> (AY683888)       | .....                             | .....                                 |
| <b>A. helicoides</b> (AY310496)      | .....                             | .....                                 |
| <b>A. euteiches</b> (FM999226)       | .....                             | .....                                 |
| A. cladogamus SAP355 (FM999228)      | .....                             | .....                                 |
| <b>A. cochlioides</b> (AY353911)     | .....                             | .....                                 |
| <b>A. iridis</b> (FM999227)          | .....                             | .....                                 |
| Leptolegnia sp. CBS177.86 (AY310502) | .....                             | .....                                 |
| Leptolegnia sp. K08 (EU240098)       | .....                             | .....                                 |
| Leptolegnia sp. PSCR0503 (EU071706)  | .....                             | .....                                 |
| Leptolegnia sp. SAP248 (AM228851)    | .....                             | .....                                 |
| Achlya racemosa (AF218158)           | .....                             | .....                                 |

**Additional file 5.**

**Alignment of primer sites for the endogenous control 5.8S rRNA amplicon used in qPCR/MCA.** Asterisks denote *A. astaci*-strains isolated in this work. Parentheses contain GenBank accessions. Oomycete reference strains [1] are given in bold. Dot: identical nucleotide with the *A. astaci* sequence.

Reference: 1. Dieguez-Uribeondo J, Garcia MA, Cerenius L, Kozubikova E, Ballesteros I, Windels C, Weiland J, Kator H, Soderhall K, Martin MP: **Phylogenetic relationships among plant and animal parasites, and saprotrophs in Aphanomyces (Oomycetes).** *Fungal Genet Biol* 2009, **46**(5):365-376.
