# Supplementary material for: Identification of two GH18 chitinase family genes and their use as targets for detection of the crayfish-plague oomycete Aphanomyces astaci
Source: PubMed Central journal article supplement (PMC2751781; doi:10.1186/1471-2180-9-184), 2009-08-31
Supplement: 1471-2180-9-184-S6.pdf [file 1471-2180-9-184-S6.pdf]

|                                           | 525<br>→                    | ←<br>640                         |
|-------------------------------------------|-----------------------------|----------------------------------|
| <b><i>A. astaci</i></b> (AY310501)        | <b>AAGAAGGCTAAATTGCGGTA</b> | <b>CAGAAT-----GCGGAGTCGGATAG</b> |
| <b><i>A. frigidophilus</i></b> (AY647192) | .G.....A.....               | ..A.....GA.....                  |
| <i>A. frigidophilus</i> SAP472 (FM992370) | .G.....A.....               | ..A.....GA.....                  |
| <b><i>A. invadans</i></b> (FM999229)      | .G....AA.....               | ..A.....GA.....                  |
| <i>A. invadans</i> WIC (AF396684)         | .G....AA.....               | ..A.....GA.....                  |
| <i>A. invadans</i> NJM9701 (EU422990)     | .G....AA.....               | ..A.....GA.....                  |
| <b><i>A. repetans</i></b> (AY683897)      | .G.G..AT.....               | TGA.....-A...CAA..GCT            |
| <i>A. laevis</i> CBS107.52 (AY310497)     | .G.G..AT.....               | TGA.....A..AGCAA.AGCCT           |
| <i>A. sp.</i> LIT7 (FM955258)             | .G.....A.....               | ....--.....-----                 |
| <b><i>A. stellatus</i></b> (AY683888)     | .G....AA.....Y.             | ..NG.....GT.TT.....              |
| <b><i>A. helicoides</i></b> (AY310496)    | ...G..ATG.....              | TGA.....A-....CAA..G..           |
| <i>A. euteiches</i> (AY647190)            | ...T..A.....G.....          | TGT.T.TATGGAA.AG.AAA..GCA        |
| <i>A. cladogamus</i> AP355 (FM999228)     | ...T..AA.....G.....         | TGTGT.AATGGAA.AG.AGAACGCA        |
| <i>A. cochlioides</i> (AY647191)          | .G.G..AT.....               | TGA.....AGA.GCAA.AGCTA           |
| <i>Achlya racemosa</i> (AF218158)         | .G...AAA.....               | .....TT..TAA...A                 |
| <i>Leptolegnia sp.</i> SAP248 (AM228851)  | .GA...AGC....C.....         | ..AG.....A.A.AAA..TA             |

#### Additional file 6.

#### A conventional PCR assay for detection of *A. astaci* that may fail to discriminate between closely related species.

Alignment of target sites for the *ITS2*-primers 525 (5'-AAGAAGGCTAAATTGCGGTA) and 640 (5'-CTATCCGACTCCGCATTCTG) from [1]. Oomycete reference strains [2] are given in bold. Dot: identical nucleotide with the *A. astaci* sequence; gap: deletion.

#### References

- Oidtman B, Schaefer N, Cerenius L, Söderhäll K, Hoffmann RW: **Detection of genomic DNA of the crayfish plague fungus *Aphanomyces astaci* (Oomycete) in clinical samples by PCR.** *Vet Microbiol* 2004, **100**(3-4):269-282.
- Dieguez-Urbeondo J, Garcia MA, Cerenius L, Kozubikova E, Ballesteros I, Windels C, Weiland J, Kator H, Soderhall K, Martin MP: **Phylogenetic relationships among plant and animal parasites, and saprotrophs in *Aphanomyces* (Oomycetes).** *Fungal Genet Biol* 2009, **46**(5):365-376.
