# Supplementary material for: Identification of two GH18 chitinase family genes and their use as targets for detection of the crayfish-plague oomycete Aphanomyces astaci
Source: PubMed Central journal article supplement (PMC2751781; doi:10.1186/1471-2180-9-184), 2009-08-31
Supplement: 1471-2180-9-184-S8.pdf [file 1471-2180-9-184-S8.pdf]

|                                                          |                           |                              |                          |
|----------------------------------------------------------|---------------------------|------------------------------|--------------------------|
| <i>A. astaci</i> <b>CHI3</b> (FJ457089)                  | <b>TCAAGCAAAGCAAAGGCT</b> | <b>CCATTGGCGGGTGGACGTTGA</b> | <b>TCCATCGCGAGCACGGA</b> |
| <i>A. astaci</i> <b>CHI2</b> (DQ974157)                  | .....                     | .....                        | .....A..                 |
| <i>A. astaci</i> <b>CHI1</b> (AY866375)                  | .....                     | .....                        | .....                    |
| <i>A. frigidophilus</i> <b>SAP472, CHI1</b> (GQ152605)   | .....GCGC..C              | .G..C.....C..                | GG.....                  |
| <i>A. frigidophilus</i> <b>NJM 9665, CHI1</b> (GQ152604) | .....GCGC..C              | .G..C.....C..                | GA.....                  |
| <i>A. invadans</i> <b>CHI1</b> (GQ374536)                | A.....TC...A.....TTC      | .....T.....                  | GA.....CGA.T....         |
| <i>A. laevis</i> <b>CHI1</b> (AY866379)                  | A.....TC...A.GC..TTC      | ....C..T..C.....TC.C.        | GG.....C.....C..         |
| <i>A. repetans</i> <b>CHI1</b> (EU523123)                | A.....TC...A.GC..TTC      | ....C.....A.....CC.C.        | GG.....C.....C..         |
| <i>A. helicoides</i> <b>CHI1</b> (AY866380)              | A.....TC...A.GC..TTC      | ....C.....C.....CC.C.        | AG.....C.....C..         |
| <i>Leptolegnia caudata</i> <b>CHI1</b> (AY866382)        | A....ATG...A.G...TT.      | .G..C.....C.....             | GG.T.T..C.....C..        |
| <i>Saprolegnia parasitica</i> <b>CHI1</b> (AY866378)     | A....ATG...A.GGTCCA.      | .G..C..T..C.....C.C.         | GG.T.T..AGC...C..        |
| <i>Achlya racemosa</i> <b>CHI1</b> (AY866381)            | AT...ATG..AA.G...TAC      | .T..C.....T.....C.C.         | GGGT.TT.T.....           |
| <i>Trichosporon cutaneum</i> <b>CHI1</b> (AY866377)      | A....ATG..AA.G.C.CAC      | .G..C.....C.....C.C.         | GG.T.T...GCG..C..        |
| <i>Fusarium solani</i> <b>CHI1</b> (AY866376)            | A.CTC.TC...AGGCGCAAC      | .AG.C..A..A.....C.AC.        | G.TCC...T.....CCC        |

**Additional file 7.**

**TaqMan qPCR assay design for sensitive detection and quantification of *A. astaci*.**

Target sites of primers and probe are highlighted by arrows and line, respectively. Parentheses contain GenBank accession numbers. Primers of the TaqMan qPCR and qPCR/MCA assays are identical except the deleted nucleotide at the very 5' end of the reverse primer used in qPCR/MCA (Figure 5a).
